# Supplementary material
Source: PubMed Central journal article supplement (PMC4428927)
Supplement: NIHMS645530-supplement.pdf [file NIHMS645530-supplement.pdf]

## Altered Glutamate Protein Co-Expression Network Topology Linked to Spine Loss in the Auditory Cortex of Schizophrenia

### Supplement 1

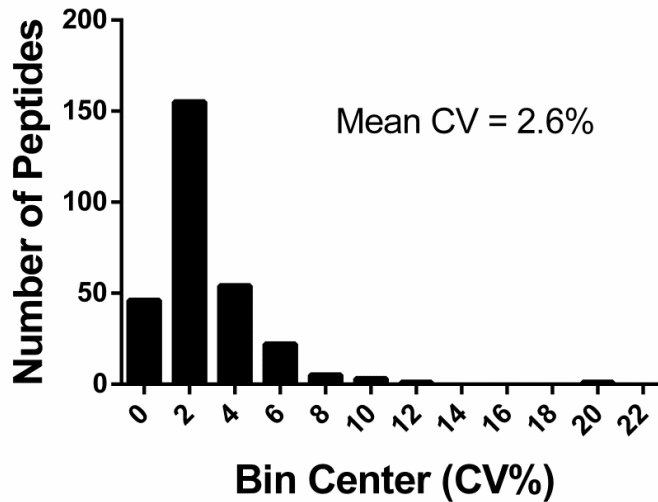

**Figure S1. Assay precision.** Four 10  $\mu$ g aliquots from a single auditory cortex gray matter homogenate were prepared and analyzed by liquid chromatography-selected reaction monitoring/mass spectrometry. 287 peptides from 184 proteins were quantified. The distribution of peptides coefficient of variation (CV) % is shown.

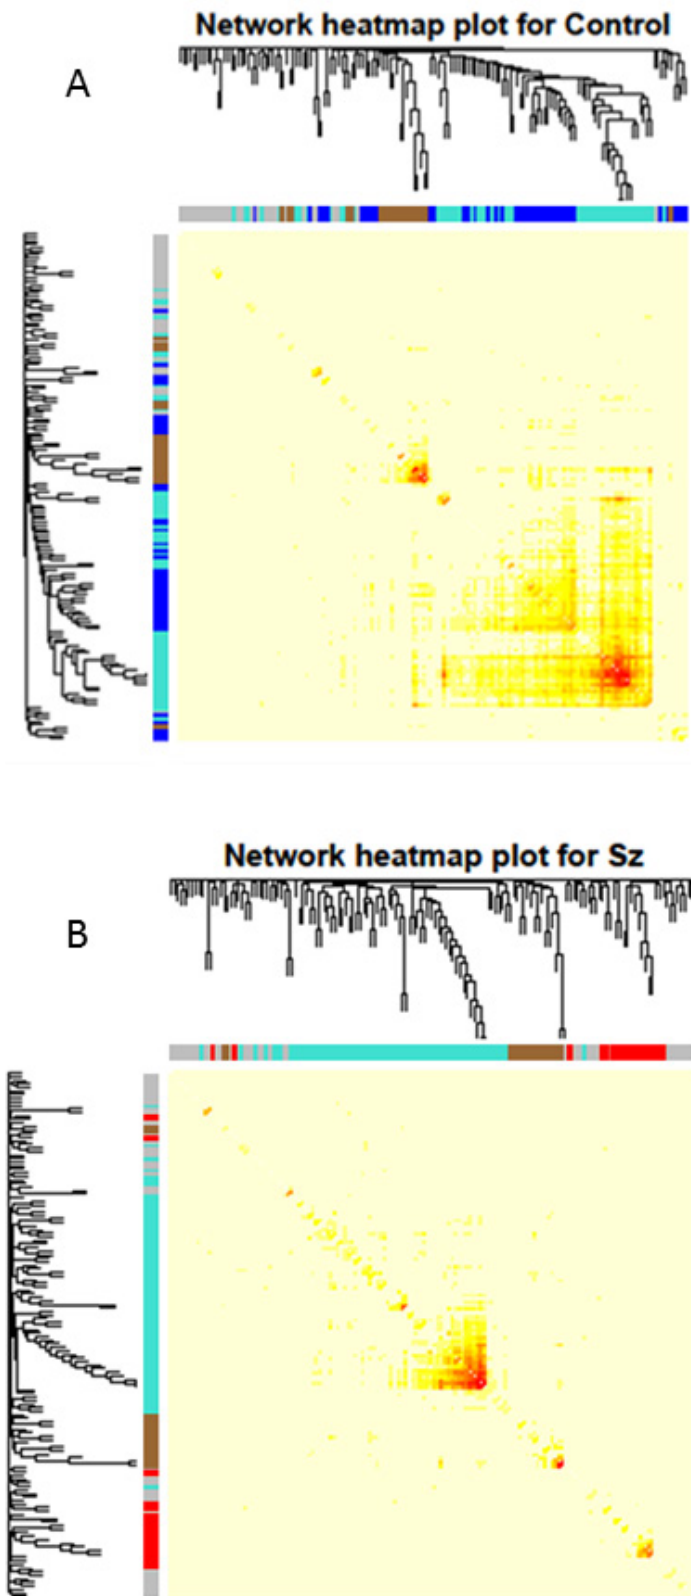

**Figure S2. Altered glutamate signaling protein network in auditory cortex in (A) control and (B) schizophrenia (Sz) subjects.** Heat maps of protein co-expression where red indicates greater correlation.

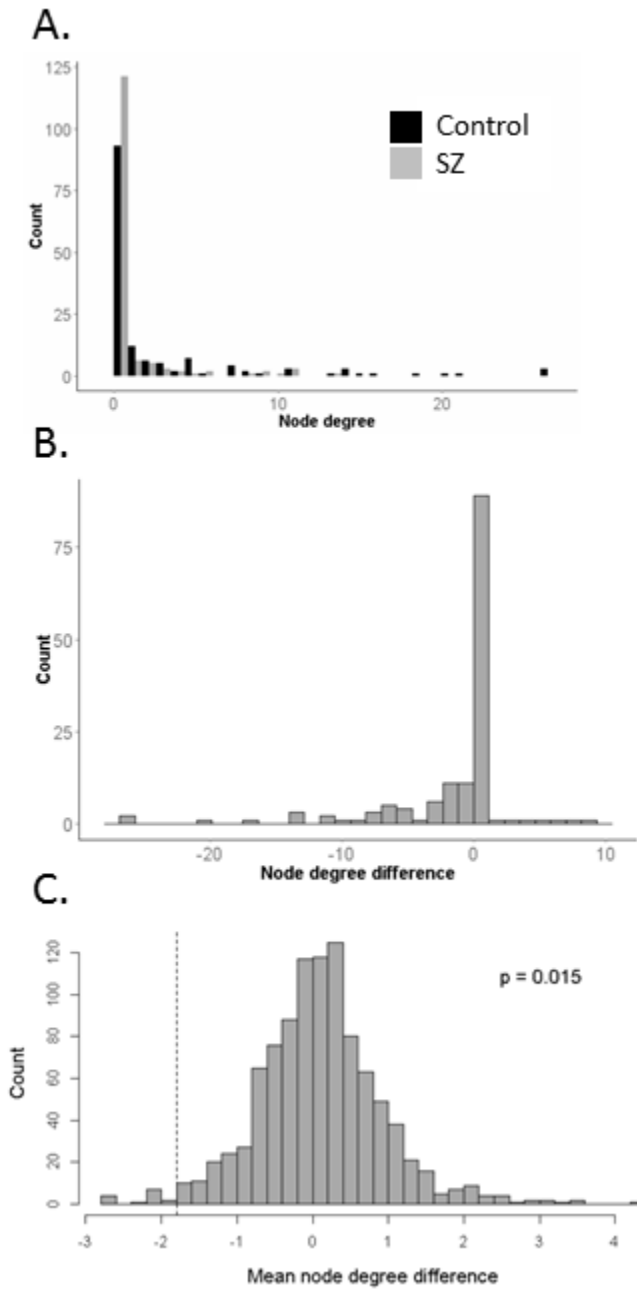

**Figure S3. Statistical comparison of Control and Schizophrenia (SZ) network connectivity.** (A) Distribution of node degree scores for all proteins quantified by liquid chromatography-selected reaction monitoring/mass spectrometry in the SZ and control cohorts. (B) Distribution of the node degree differences (SZ - Control) for all proteins. Mean = -1.80 indicating greater connectivity in the Control network. (C) Distribution of the average mean node degree differences calculated from 1000 permutations of sample diagnosis. The observed mean difference from (B), -1.80, is indicated by the dotted line.

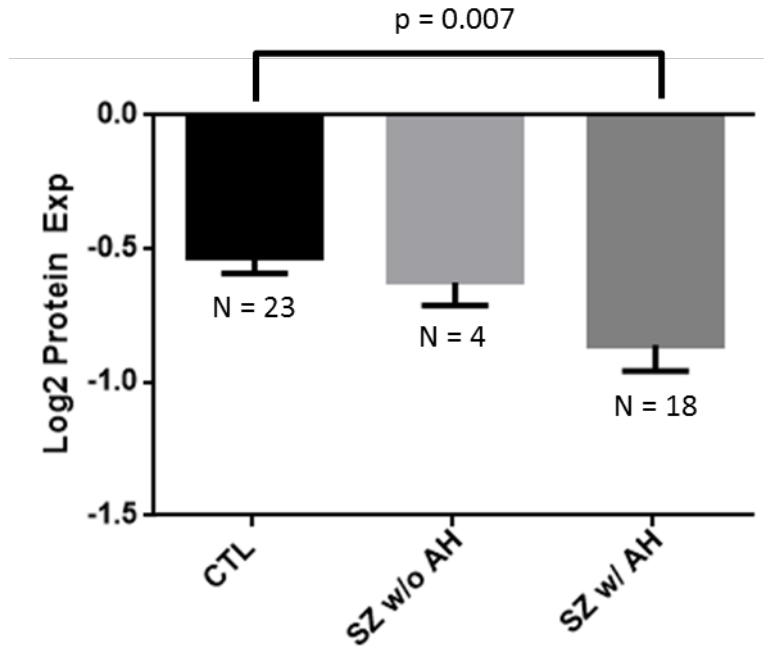

**Figure S4. ATP1A3 expression is linked to auditory hallucinations (AH) in schizophrenia (SZ).** ATP1A3 mutations that decrease protein expression are associated with auditory hallucinations in rapid onset dystonia parkinsonism patients. The SZ cohort was divided into those with and without auditory hallucinations. The decrease in ATP1A3 was greater, reaching significance, in SZ patients with auditory hallucinations. CTL, control.

**Table S1. Subject characteristics.**

| Case  | Sex | Race | Age | PMI  | pH  | COD                         | Hand | Diagnosis                      |
|-------|-----|------|-----|------|-----|-----------------------------|------|--------------------------------|
| 1326  | M   | W    | 58  | 16.4 | 6.7 | ASCVD                       | R    | None                           |
| 1086  | M   | W    | 51  | 24.2 | 6.8 | ASCVD                       | R    | None                           |
| 10005 | M   | W    | 42  | 23.5 | 6.7 | Trauma                      | R    | None                           |
| 1201  | F   | W    | 52  | 16.4 | 6.2 | ASCVD                       | R    | None                           |
| 1255  | M   | B    | 37  | 22   | 5.9 | Pulmonary embolism          | R    | None                           |
| 1119  | M   | W    | 57  | 20.2 | 6.8 | ASCVD                       | R    | None                           |
| 1317  | M   | W    | 56  | 22.9 | 6.5 | ASCVD                       | L    | None                           |
| 1307  | M   | B    | 32  | 4.8  | 6.7 | ASCVD                       | R    | None                           |
| 1067  | M   | W    | 49  | 6    | 6.6 | ASCVD                       | R    | None                           |
| 1196  | F   | W    | 36  | 14.5 | 6.4 | Asphyxiation                | R    | None                           |
| 806   | M   | W    | 57  | 24   | 6.9 | Pulmonary embolism          | R    | None                           |
| 739   | M   | W    | 40  | 15.8 | 6.9 | ASCVD                       | R    | None                           |
| 822   | M   | B    | 28  | 25.3 | 7   | ASCVD                       | L    | None                           |
| 727   | M   | B    | 19  | 7    | 7.2 | Trauma                      | R    | None                           |
| 659   | M   | O    | 46  | 22.2 | 6.9 | Peritonitis                 | R    | None                           |
| 852   | M   | W    | 54  | 8    | 6.8 | Cardiac tamponade           | R    | None                           |
| 685   | M   | W    | 56  | 14.5 | 6.6 | Hypoplastic coronary artery | R    | None                           |
| 686   | F   | W    | 52  | 22.6 | 7   | ASCVD                       | R    | None                           |
| 1092  | F   | B    | 40  | 16.6 | 6.8 | Mitral valve prolapse       | R    | None                           |
| 1488  | M   | B    | 39  | 21.5 | 6.4 | Pulmonary embolism          | R    | None                           |
| 1047  | M   | W    | 43  | 13.8 | 6.6 | ASCVD                       | R    | None                           |
| 700   | M   | W    | 42  | 26.1 | 7   | ASCVD                       | R    | None                           |
| 818   | F   | W    | 67  | 24   | 7.1 | Anaphylactic reaction       | R    | None                           |
| 1453  | M   | W    | 62  | 11.1 | 6.4 | Trauma                      | R    | Paranoid schizophrenia         |
| 1256  | M   | W    | 34  | 27.4 | 6.4 | Hanging                     | R    | Undifferentiated schizophrenia |
| 1189  | F   | W    | 47  | 14.4 | 6.4 | Combined drug overdose      | R    | Schizoaffective disorder       |
| 10020 | M   | W    | 38  | 28.8 | 6.6 | Salicylate overdose         | R    | Paranoid schizophrenia         |
| 1263  | M   | W    | 62  | 22.7 | 7.1 | Asphyxiation                | R    | Undifferentiated schizophrenia |
| 1173  | M   | W    | 62  | 22.9 | 6.4 | ASCVD                       | R    | Disorganized schizophrenia     |
| 1361  | M   | W    | 63  | 23.2 | 6.4 | Cardiomyopathy              | U    | Schizoaffective disorder       |
| 10024 | M   | B    | 37  | 6    | 6.1 | ASCVD                       | L    | Paranoid schizophrenia         |
| 10023 | F   | B    | 25  | 20.1 | 6.7 | Drowning                    | R    | Disorganized schizophrenia     |
| 665   | M   | B    | 59  | 28.1 | 6.9 | Intestinal hemorrhage       | R    | Paranoid schizophrenia         |
| 1088  | M   | W    | 49  | 21.5 | 6.5 | Combined drug overdose      | R    | Undifferentiated schizophrenia |
| 787   | M   | B    | 27  | 19.2 | 6.7 | Gunshot                     | L    | Schizoaffective disorder       |
| 829   | M   | W    | 25  | 5    | 6.8 | Salicylate overdose         | U    | Schizoaffective disorder       |
| 930   | M   | W    | 47  | 15.3 | 6.2 | ASCVD                       | R    | Disorganized schizophrenia     |
| 722   | M   | B    | 45  | 9.1  | 6.7 | Upper GI bleed              | R    | Undifferentiated schizophrenia |
| 1105  | M   | W    | 53  | 7.9  | 6.2 | ASCVD                       | R    | Schizoaffective disorder       |
| 802   | F   | W    | 63  | 29   | 6.4 | Right ventricular dysplasia | A    | Schizoaffective disorder       |
| 1010  | F   | B    | 44  | 18.7 | 6.2 | Sudden unexpected death     | L    | Undifferentiated schizophrenia |
| 1222  | M   | W    | 32  | 30.8 | 6.4 | Combined drug overdose      | R    | Undifferentiated schizophrenia |
| 933   | M   | W    | 44  | 8.3  | 5.9 | Myocarditis                 | U    | Disorganized schizophrenia     |
| 625   | M   | B    | 49  | 23.5 | 7.3 | ASCVD                       | R    | Disorganized schizophrenia     |
| 917   | F   | W    | 71  | 23.8 | 6.8 | ASCVD                       | U    | Undifferentiated schizophrenia |

F, female; M, male; W, white; B, black; COD, cause of death; ASCVD, atherosclerotic cardiovascular disease; GI, gastrointestinal; L, left-handed; R, right-handed; A, ambidextrous; U, unknown; PMI, postmortem interval.

**Table S2. Differentially expressed peptides in auditory cortex gray matter homogenates, as measured by LC-SRM/MS.** The difference in average expression values and *p*-values for the peptides used to quantify the proteins reported in Table 2 are reported here. Bolded proteins are members of the glutamate signaling pathway.

| <b>Protein</b> | <b>SZ/CTL</b> | <b><i>p</i> (Protein)</b> | <b>Peptide</b>   | <b><i>p</i> (Peptide)</b> |
|----------------|---------------|---------------------------|------------------|---------------------------|
| <b>GRIA4</b>   | 0.69          | 0.0004                    | QTEIAYGTLDSGSTK  | 0.0064                    |
|                |               |                           | GSSLGNAVNLAFLK   | 0.0236                    |
| <b>GRIA3</b>   | 0.72          | 0.0139                    | GSALGTPVNLAFLK   | 0.0139                    |
| <b>ATP1A3</b>  | 0.93          | 0.0189                    | CIELSSGSVK       | 0.0180                    |
|                |               |                           | GGQDNIPVLK       | 0.0191                    |
| PHB2           | 0.95          | 0.0323                    | IVQAEGEAEAAK     | 0.0323                    |
| UCHL1          | 1.1           | 0.0412                    | FSAVALCK         | 0.0412                    |
| VIM            | 0.9           | 0.0425                    | EYQDLLNVK        | 0.0425                    |
| HSP90B         | 0.89          | 0.0576                    | NPDDITQEEYGEFYK  | 0.0576                    |
| PSMA1          | 1.1           | 0.0594                    | LVSLIGSK         | 0.0594                    |
| GAD65          | 0.9           | 0.0598                    | HYDLSYDTGDK      | 0.0598                    |
| <b>GNAQ</b>    | 1.2           | 0.0611                    | VSAFENPYVDAIK    | 0.0611                    |
| NDUFV1         | 0.93          | 0.0662                    | GGAGFPTGLK       | 0.0662                    |
| SYN1           | 0.88          | 0.0696                    | SLKPDFLIR        | 0.0456                    |
|                |               |                           | TYATAEPFIDAK     | 0.3024                    |
| PRKCA          | 0.86          | 0.0792                    | LTDFNFLMVLGK     | 0.1246                    |
|                |               |                           | STLNPQWNESFTFK   | 0.2512                    |
| PC             | 0.77          | 0.0831                    | GANAVGYTNYPDNVVK | 0.0831                    |
| DNM1           | 1.13          | 0.0899                    | NLVDSYMAIVNK     | 0.4664                    |
|                |               |                           | DMLMQFVTK        | 0.5083                    |
| CTNNB1         | 1.12          | 0.092                     | SGGIPALVK        | 0.0920                    |
| ATP5A1         | 0.93          | 0.0923                    | HALIYDDLK        | 0.0561                    |
|                |               |                           | VVDALGNAIDGK     | 0.0766                    |
|                |               |                           | TSIAIDTIINQK     | 0.0302                    |

CTL, control; SZ, schizophrenia; LC-SRM/MS, liquid chromatography-selected reaction monitoring/mass spectrometry.

| CTL       | Protein | SZ        |
|-----------|---------|-----------|
| brown     | ATP5A1  | brown     |
| brown     | PPP2A   | brown     |
| brown     | ATP1B1  | brown     |
| brown     | CKB     |           |
| brown     | RHOA    |           |
| brown     | TUBB    |           |
| brown     | STXBP1  |           |
| brown     | HSPD1   | turquoise |
|           | YWHAZ   | turquoise |
|           | NDUFA10 | turquoise |
|           | HSPA5   | turquoise |
|           | PRDX1   | turquoise |
|           | SLC25A3 | turquoise |
| turquoise | UCHL1   | turquoise |
| turquoise | YWHAE   | turquoise |
| turquoise | RAC1    | turquoise |
| turquoise | ATPO    | turquoise |
| turquoise | GLUD1   | turquoise |
| turquoise | NSF     | turquoise |
| turquoise | STIP1   | turquoise |
| turquoise | VDAC1   | turquoise |
| turquoise | GNAZ    | turquoise |
| turquoise | GRIA2   | turquoise |
| turquoise | ARF1    |           |
| turquoise | ENO2    |           |
| turquoise | GAPDH   |           |
| turquoise | HSPA4   |           |
| turquoise | YWHAQ   |           |
| turquoise | ACO1    |           |
| turquoise | IDH3A   |           |
| turquoise | NDUFV1  |           |
| turquoise | VDAC2   |           |
| turquoise | VDAC3   |           |
| turquoise | AP1B1   |           |
| turquoise | AP2A2   |           |
| turquoise | CNP     |           |
| turquoise | ATP1A1  |           |
| turquoise | ATP2A2  |           |
| turquoise | SYT1    |           |
| turquoise | GNAI1   |           |
| blue      | GNA1    |           |
| blue      | GNB1    |           |
| blue      | CLTC    |           |
| blue      | NRXN3   |           |
| blue      | ATP1A3  |           |
| blue      | NCAM2   |           |
| blue      | RAB3A   |           |
| blue      | SEPT3   |           |
| blue      | VGLUT3  |           |
| blue      | ATP6V1A |           |
| blue      | RAB10   |           |
| blue      | HK1     |           |
| blue      | SPTB    |           |
| blue      | AP2M1   |           |
| blue      | SYN1    |           |
| blue      | SPTA1   | red       |
| blue      | SYNJ1   | red       |
|           | ANK1    | red       |
|           | ANK2    | red       |

**Table S3. Composition of protein co-expression networks.** Proteins composing the co-expression network modules (blue, brown, turquoise, and red) visualized in Figure 1 are reported for control (CTL) and schizophrenia (SZ) subjects.

**Table S4. Proteins that differ significantly in connectivity between the control (CTL) and schizophrenia (SZ) networks.**

| Protein                                           | Node Degree CTL | Node Degree SZ | Delta Node Degree | <i>p</i> |
|---------------------------------------------------|-----------------|----------------|-------------------|----------|
| <b><i>Significantly Reduced Node Degree</i></b>   |                 |                |                   |          |
| ARF1                                              | 8               | 0              | -8                | 0.005    |
| ATP2A2                                            | 6               | 0              | -6                | 0.02     |
| CNP                                               | 6               | 0              | -6                | 0.008    |
| ENO2                                              | 26              | 0              | -26               | 0.001    |
| GAPDH                                             | 34              | 0              | -34               | < 0.001  |
| GNAZ                                              | 17              | 2              | -15               | 0.001    |
| GNB1                                              | 30              | 0              | -30               | < 0.001  |
| HK1                                               | 15              | 0              | -15               | 0.006    |
| HSPA4                                             | 4               | 0              | -4                | 0.02     |
| IDH3A                                             | 10              | 0              | -10               | 0.002    |
| NCAM2                                             | 8               | 0              | -8                | 0.018    |
| NDUFV1                                            | 21              | 0              | -21               | 0.012    |
| NSF                                               | 28              | 9              | -19               | 0.012    |
| SEPT3                                             | 6               | 0              | -6                | 0.005    |
| SPTA1                                             | 7               | 3              | -4                | < 0.001  |
| SPTB                                              | 14              | 0              | -14               | 0.004    |
| SYT1                                              | 9               | 0              | -9                | 0.02     |
| VDAC1                                             | 26              | 13             | -13               | 0.008    |
| <b><i>Significantly Increased Node Degree</i></b> |                 |                |                   |          |
| ANK1                                              | 0               | 2              | 2                 | 0.016    |
| ANK2                                              | 0               | 3              | 3                 | 0.007    |
| NDUFA10                                           | 0               | 9              | 9                 | 0.016    |



**Table S5. Association of clinical factors with differentially expressed proteins.** Table shows the impact and significance of the potential confounding factors suicide, substance abuse, schizoaffective disorder, antipsychotic medication, and auditory hallucinations on expression of the differentially expressed proteins reported in Table 2.

| Protein | Suicide (Y vs N) |                 | Substance (Y vs N) |                 | Schizoaffective (Y vs N) |                 | Antipsychotic (Y vs N) |                 | Auditory Hallucination (Y vs N) |                 |
|---------|------------------|-----------------|--------------------|-----------------|--------------------------|-----------------|------------------------|-----------------|---------------------------------|-----------------|
|         | Fold change      | <i>p</i> -value | Fold change        | <i>p</i> -value | Fold change              | <i>p</i> -value | Fold change            | <i>p</i> -value | Fold change                     | <i>p</i> -value |
| GRIA4   | 1.15             | 0.337           | 0.87               | 0.346           | 1.19                     | 0.266           | 0.90                   | 0.615           | 1.13                            | 0.507           |
| GRIA3   | 1.18             | 0.397           | 0.94               | 0.724           | 1.11                     | 0.598           | 0.92                   | 0.725           | 0.79                            | 0.286           |
| ATP1A3  | 1.02             | 0.742           | 1.02               | 0.724           | 0.97                     | 0.601           | 0.95                   | 0.406           | 0.95                            | 0.327           |
| PHB2    | 1.01             | 0.689           | 1.00               | 0.975           | 1.02                     | 0.573           | 0.92                   | 0.082           | 0.94                            | 0.165           |
| UCHL1   | 1.08             | 0.583           | 1.25               | 0.089           | 1.14                     | 0.352           | 0.72                   | 0.069           | 0.94                            | 0.691           |
| VIM     | 0.91             | 0.21            | 0.99               | 0.912           | 0.86                     | 0.073           | 0.95                   | 0.648           | 1.01                            | 0.906           |
| HSP90B  | 0.95             | 0.577           | 0.96               | 0.64            | 0.96                     | 0.679           | 0.94                   | 0.594           | 1.01                            | 0.947           |
| PSMA1   | 1.03             | 0.677           | 0.96               | 0.586           | 1.05                     | 0.544           | 0.88                   | 0.185           | 0.89                            | 0.202           |
| GAD65   | 1.04             | 0.66            | 1.00               | 0.968           | 0.98                     | 0.77            | 1.01                   | 0.928           | 1.23                            | 0.047           |
| GNAQ    | 0.95             | 0.743           | 0.91               | 0.513           | 1.04                     | 0.807           | 0.83                   | 0.333           | 0.57                            | 0.002           |
| NDUFV1  | 1.02             | 0.741           | 1.01               | 0.919           | 0.95                     | 0.533           | 0.83                   | 0.048           | 1.07                            | 0.463           |
| SYN1    | 0.93             | 0.553           | 1.05               | 0.658           | 1.14                     | 0.301           | 0.76                   | 0.076           | 0.95                            | 0.701           |
| PRKCA   | 1.05             | 0.693           | 0.93               | 0.554           | 0.99                     | 0.915           | 0.93                   | 0.663           | 1.21                            | 0.181           |
| PC      | 1.15             | 0.455           | 0.85               | 0.482           | 0.88                     | 0.488           | 1.18                   | 0.414           | 1.26                            | 0.337           |
| DNM1    | 1.02             | 0.867           | 1.12               | 0.285           | 1.07                     | 0.553           | 0.87                   | 0.321           | 0.99                            | 0.914           |
| CTNNB1  | 0.87             | 0.16            | 0.86               | 0.112           | 1.09                     | 0.405           | 0.97                   | 0.798           | 0.80                            | 0.053           |
| ATP5A1  | 1.11             | 0.159           | 1.09               | 0.224           | 1.05                     | 0.529           | 0.86                   | 0.133           | 0.93                            | 0.429           |

N, no; Y, yes.

## **Supplemental Methods**

### **Liquid Chromatography - Selected Reaction Monitoring/Mass Spectrometry (LC-SRM/MS) of Human Heschl's Gyrus Homogenates**

LC-SRM/MS analyses were conducted on a TSQ Quantum triple stage quadrupole mass spectrometer (ThermoFisher Scientific) with an Ultimate 3000 HPLC (Dionex). 5  $\mu$ l (~2.5  $\mu$ g protein) of the sample was loaded on to a Magic C18 column (Michrom) at 1  $\mu$ l/min for 12 min, and eluted at 750 nl/min over a 25 min gradient from 3-35% mobile phase B (acetonitrile containing 0.1% formic acid). SRM transitions were timed using 1 – 1.5 min retention windows, depending on the number of SRMs to be assayed. Transitions were monitored, allowing for a cycle time of 1 sec, resulting in a dynamic dwell time, never falling below 10 msec. The MS instrument parameters were as follows: capillary temperature 275°C, spray voltage 1100 V, and a collision gas of 1.4 mTorr (argon). The resolving power of the instrument was set to 0.7 Da (full width half maximum (FWHM)) for the first and third quadrupole. Data were acquired using a Chrom filter peak width of 4.0 sec.

### **Rhesus Monkey Tissue Preparation and LC-SRM/MS**

The ventral bank of the principal sulcus was dissected as a sample of dorsolateral prefrontal cortex (Brodmann area 46), as Heschl's gyrus tissue was unavailable, from which 100 mg gray matter was dissected. 50 mg gray matter was homogenized in .5 ml 0.32 M sucrose solution (1 mM MgCl<sub>2</sub> and 0.1 mM CaCl<sub>2</sub> with protease and phosphatase inhibitors) with a Teflon pestle. Approximately 45  $\mu$ l of the homogenate was aliquoted, solubilized with 1% SDS and clarified by centrifugation. Protein concentration was measured by micro BCA™ assay in duplicate (Pierce). 20  $\mu$ g of this homogenate were mixed with 20  $\mu$ g of the <sup>13</sup>C<sub>6</sub>STD and processed for LC-SRM/MS analysis by on-gel trypsin digestion as previously described (1). LC-SRM/MS analyses were conducted on a TSQ Vantage triple stage quadrupole mass

spectrometer (ThermoFisher Scientific) with an Eksigent 2Dnano LC (Eksigent) and a CaptiveSpray source (Michrom). 5  $\mu$ l (~2.5  $\mu$ g protein) of the sample was loaded on to a Magic C18 column (Michrom) at 1  $\mu$ l/min for 12 min, and eluted at 750 nl/min over a 25 min gradient from 3-35% mobile phase B (ACN containing .1% formic acid). SRM transitions were timed using 1 – 1.5 min retention windows, depending on the number of SRMs to be assayed. Transitions were monitored, allowing for a cycle time of 1 sec, resulting in a dynamic dwell time, never falling below 10 msec. The MS instrument parameters were as follows: capillary temperature 275°C, spray voltage 1100 V, and a collision gas of 1.4 mTorr (argon). The resolving power of the instrument was set to 0.7 Da (FWHM) for Q1 and Q3. Data were acquired using a Chrom filter peak width of 4.0 sec.

### **Peptide/Protein Selection**

The selection process for the proteins included in this SRM assay has been extensively described (1). Briefly: Proteins were chosen from previous discovery proteomics analyses of human postmortem cortex pre- and post-synaptic enrichments (1, 2) to interrogate glutamate signaling, and thus include glutamate receptors, signaling proteins and scaffolds as well as other synaptic proteins. Non-redundant peptides from synaptic proteins, including glutamate receptors, kinases, phosphatases and those with roles in vesicular fusion, energy and amino acid metabolism, protein trafficking, cytoskeleton and scaffolding were selected from previously published spectral libraries (1-3). The peptides were then filtered by the following criteria: 1) the presence of a lysine, the amino acid labeled in the  $^{13}\text{C}_6$ STD, 2) non-redundant to a selected protein or protein group (determined by BLAST search) and 3) 100% homology across mouse and human sequences (determined by BLAST search).

## Data Processing

Peak areas and area ratios were calculated for each peptide within Skyline (4). Raw files generated by LC-SRM/MS analysis were loaded into Skyline files containing target proteins/peptides/transitions. All individual SRM transitions and integration areas were manually inspected. Transitions for which the signal-to-noise ratio was below 3 were excluded from analysis. The ratios of the integrated areas for “light” endogenous peptides and “heavy”  $^{13}\text{C}_6$ STD peptides were calculated to obtain peptide measures using multiple transitions per peptide. For the proteins with multiple peptides, peptide ratios (light/heavy, before log<sub>2</sub> transformation) within the same protein were summed up to obtain the protein level ratios (5). All the ratios were then log<sub>2</sub> transformed for the following statistical analysis.

## Supplemental References

1. Macdonald ML, Ciccimaro E, Prakash A, Banerjee A, Seeholzer SH, Blair IA, *et al.* (2012): Biochemical fractionation and stable isotope dilution liquid chromatography-mass spectrometry for targeted and microdomain-specific protein quantification in human postmortem brain tissue. *Mol Cell Proteomics*. 11:1670-1681.
2. Hahn C-G, Banerjee A, Macdonald ML, Cho D-S, Kamins J, Nie Z, *et al.* (2009): The post-synaptic density of human postmortem brain tissues: an experimental study paradigm for neuropsychiatric illnesses. *PLoS One*. 4:e5251.
3. Trinidad JC, Thalhammer A, Specht CG, Lynn AJ, Baker PR, Schoepfer R, *et al.* (2008): Quantitative analysis of synaptic phosphorylation and protein expression. *Mol Cell Proteomics*. 7:684-696.
4. MacLean B, Tomazela DM, Shulman N, Chambers M, Finney GL, Frewen B, *et al.* (2010): Skyline: an open source document editor for creating and analyzing targeted proteomics experiments. *Bioinformatics*. 26:966-968.
5. Carrillo B, Yanofsky C, Laboissiere S, Nadon R, Kearney RE (2010): Methods for combining peptide intensities to estimate relative protein abundance. *Bioinformatics*. 26:98-103.
